# Supplementary material for: Magnetic silk fibroin nanospheres loaded with amphiphilic polypeptides and antibiotics for biofilm eradication
Source: Royal Society of Chemistry journal article supplement (doi:10.1039/d4bm01065e), 2024-01-01
Supplement: d4bm01065e1.pdf [file d4bm01065e1.pdf]

## ***Supporting Information***

# Magnetic silk fibroin nanospheres loaded with amphiphilic polypeptides and antibiotics for biofilm eradication

*Yufang Bi, Xuyang Chen, Feiyu Luo, Xiehe Wang, Xin Chen, Jinrong Yao\*, and*

*Zhengzhong Shao\**

State Key Laboratory of Molecular Engineering of Polymers, Department of  
Macromolecular Science and Laboratory of Advanced Materials, Fudan University,

Shanghai 200438, P.R. China

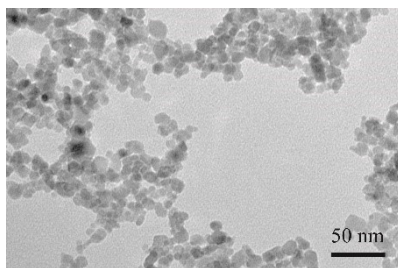

**Figure S1.** Transmission electron microscopy (TEM) image of  $\text{Fe}_3\text{O}_4$  nanoparticles.

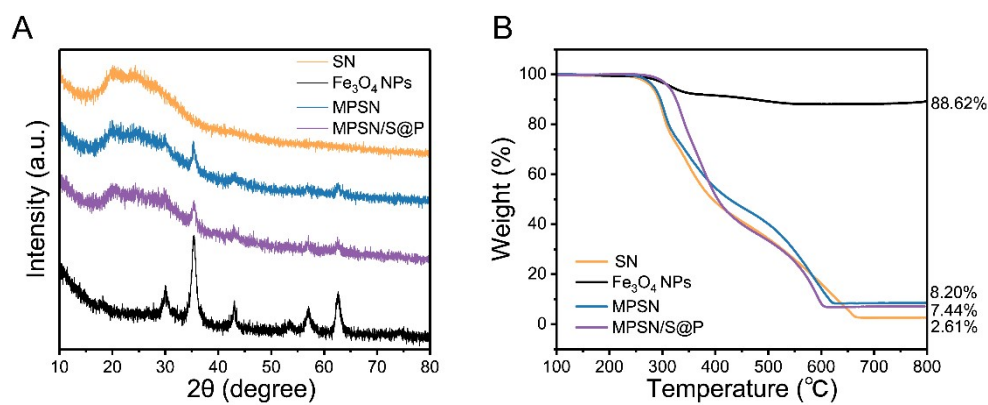

**Figure S2.** A) The XRD pattern of  $\text{Fe}_3\text{O}_4$  NPs and nanoparticles. B) TGA profiles for  $\text{Fe}_3\text{O}_4$  NPs and nanoparticles. After heating to 800 $^{\circ}\text{C}$ , the residual mass of  $\text{Fe}_3\text{O}_4$  NPs and MPSN/S@P were 88.62% and 7.44% of the original, respectively.

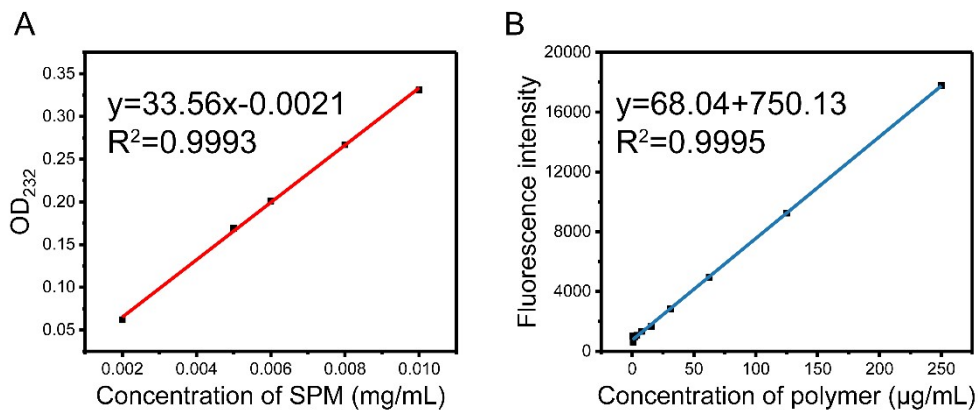

**Figure S3.** A) Standard absorbance-concentration curve of SPM at 232 nm. B) The standard curve of Lys<sub>90</sub>Val<sub>10</sub> using the fluorescamine assay.

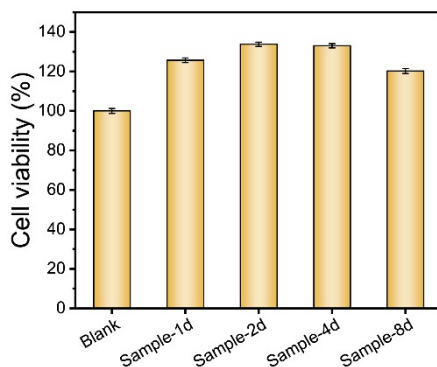

**Figure S4.** Viability of NIH 3T3 cells after incubating with extracts taken out at predetermined time points from MPSN/S@P suspension.

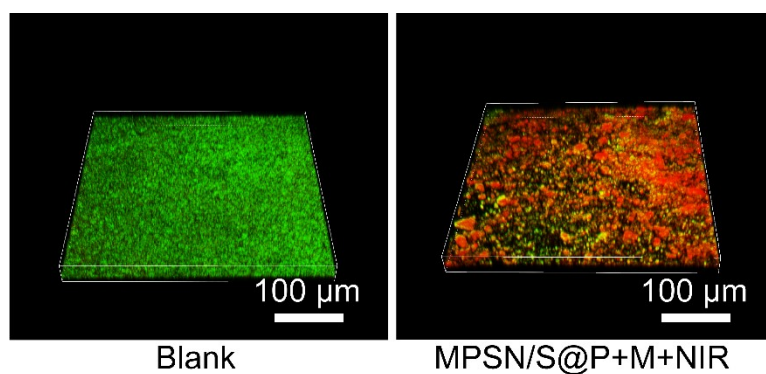

**Figure S5.** Three-dimensional confocal laser scanning microscopy (3D CLSM) images of mature *P. aeruginosa* biofilms with different treatments after 24 h.

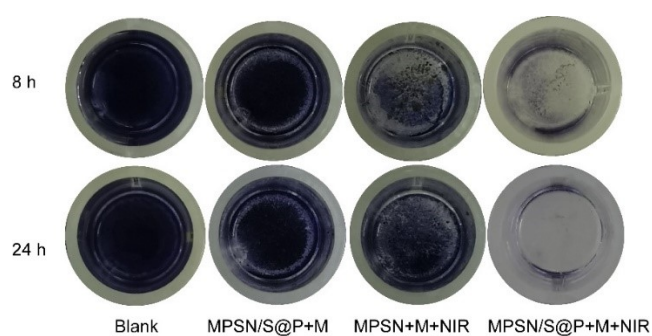

**Figure S6.** Typical pictures of biofilms visualized by staining with MTT.

**Table S1.** SPM-loading capacity and encapsulation efficiency in MPSN/S and MPSN/S@P.

| Microspheres | Feed (%) | SPM loading (%) | SPM encapsulation (%) |
|--------------|----------|-----------------|-----------------------|
| MPSN/S       | 9.0      | 2.0 ± 0.1       | 22.5 ± 1.0            |
| MPSN/S@P     | 9.0      | 1.4 ± 0.1       | 15.2 ± 0.5            |

**Table S2.** Lys<sub>90</sub>Val<sub>10</sub>-loading capacity and encapsulation efficiency in MPSN/S@P.

| Microspheres | Feed (%) | Lys <sub>90</sub> Val <sub>10</sub> loading (%) | Lys <sub>90</sub> Val <sub>10</sub> encapsulation (%) |
|--------------|----------|-------------------------------------------------|-------------------------------------------------------|
| MPSN/S@P     | 9.0      | 6.4 ± 0.8                                       | 71.2 ± 9.0                                            |
